# Supplementary material for: Combined High Resistin and EGFR Expression Predicts a Poor Prognosis in Breast Cancer
Source: Hindawi journal article supplement (doi:10.1155/2020/8835398), 2020-01-01
Supplement: f1 [file 8835398.f1.pdf]

## **Combined high resistin and EGFR expression predicts a poor prognosis in breast cancer**

Yue Zeng<sup>1-2#</sup>, Chih-Hsin Tang<sup>3-5#</sup>, Yan Wang<sup>6</sup>, Hua-Jun Lu<sup>7</sup>, Bi-Fei Huang<sup>2</sup>, Qian Wang<sup>2</sup>, Jun-Kang Shao<sup>2</sup>, Lu-Lu Jin<sup>8</sup>, Chao-Qun Wang<sup>2\*</sup>, Li-Song Teng<sup>1\*</sup>

<sup>1</sup>Department of Surgical Oncology, the First Affiliated Hospital, Medical School of Zhejiang University, Hangzhou, Zhejiang, China

<sup>2</sup>Department of Pathology, Affiliated Dongyang Hospital of Wenzhou Medical University, Dongyang, Zhejiang, China

<sup>3</sup>Graduate Institute of Basic Medical Science, China Medical University, Taichung, Taiwan

<sup>4</sup>Department of Pharmacology, School of Medicine, China Medical University, Taichung, Taiwan

<sup>5</sup>Department of Biotechnology, College of Health Science, Asia University, Taichung, Taiwan

<sup>6</sup>Department of Medical Oncology, Affiliated Dongyang Hospital of Wenzhou Medical University, Dongyang, Zhejiang, China

<sup>7</sup>Department of Oncological Radiotherapy, Affiliated Dongyang Hospital of Wenzhou Medical University, Dongyang, Zhejiang, People's Republic of China

<sup>8</sup>Laboratory of Biomedicine, Affiliated Dongyang Hospital of Wenzhou Medical University, Dongyang, Zhejiang, People's Republic of China

#These authors contributed equally to this manuscript

### **\*Corresponding author:**

Chao-Qun Wang; Department of Pathology, Affiliated Dongyang Hospital of Wenzhou Medical University, 60 Wu Ning Xi Road, Dongyang 322100, China.

E-mail: [chaoqunw869@163.com](mailto:chaoqunw869@163.com)

Li-Song Teng; Department of Surgical Oncology, the First Affiliated Hospital,  
Medical School of Zhejiang University, 79 Qingchun Road, Hangzhou 310003,  
China.

E-mail: [Lsteng@zju.edu.cn](mailto:Lsteng@zju.edu.cn)

### Supplementary materials

IHC analyses detected ERK1/2 expression in 121 breast cancer cases. A case was considered to be ERK1/2-positive if the percentage of positive invasive cancer cells (nuclear and cytoplasmic staining) was  $\geq 1\%$ <sup>1</sup>. The rate of positive ERK1/2 expression in breast cancer tissue specimens was 65.3% (79/121). We found a significantly higher level of ERK1/2 expression in specimens from resistin-positive (68.1%, 79/116) compared with those that were resistin-negative (0.0%, 0/5;  $P < 0.01$ , Table S1). Spearman correlation analysis revealed a significantly positive correlation between positive levels of resistin expression and ERK1/2-positive expression in breast cancer tissue specimens ( $r = 0.285$ ,  $P = 0.002$ ). No such correlation was observed between strongly positive resistin expression and ERK1/2 expression (Table S2).

Table S1. Relationships between positive resistin expression and ERK1/2 expression in 121 Chinese Han patients with breast cancer

| Group             | No. | ERK1/2 expression |                 |
|-------------------|-----|-------------------|-----------------|
|                   |     | Negative, n (%)   | Positive, n (%) |
| Resistin-negative | 5   | 5 (100.0%)        | 0 (0.0%)        |
| Resistin-positive | 116 | 37 (31.9%)        | 79 (68.1%)*     |

\*  $P < 0.01$ .

Table S2. Relationships between strongly positive resistin expression and ERK1/2 expression in 121 Chinese Han patients with breast cancer

| Group                              | No. | ERK1/2 expression |                 |
|------------------------------------|-----|-------------------|-----------------|
|                                    |     | Negative, n (%)   | Positive, n (%) |
| Not strongly positive for resistin | 68  | 27 (39.7%)        | 41 (60.3%)      |
| Strongly positive for resistin     | 53  | 15 (28.3%)        | 38 (71.7%)*     |

\*  $P = 0.191$ .

## References

1. Nguyen TH, Nguyen VH, Nguyen TL, Qiuyin C, Phung TH. Evaluations of Biomarker Status Changes between Primary and Recurrent Tumor Tissue Samples in Breast Cancer Patients. *BioMed research international* 2019;**2019**: 7391237.
